# Supplementary material
Source: PubMed Central journal article supplement (PMC6826005)
Supplement: joces-132-229906-s1.pdf [file joces-132-229906-s1.pdf]

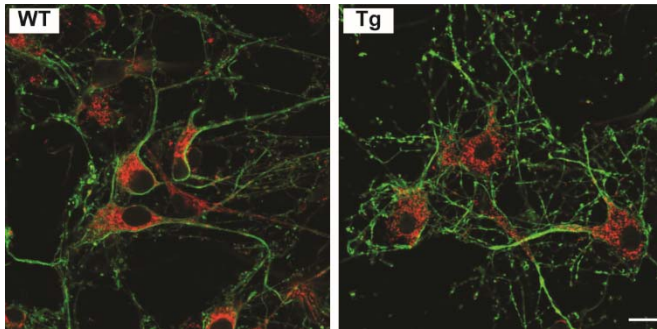

**Figure S1. Visualization of hippocampal primary neuronal cultures.** Primary neurons were cultured *in vitro* for 7 days and then fixed and stained to observe general morphology. Neurons were incubated with antibodies against  $\beta$ III-tubulin (green) or Tom20 (red). Left panel, wild-type (WT) neurons. Right panel, transgenic (Tg) neurons. Scale bar, 200  $\mu$ m.

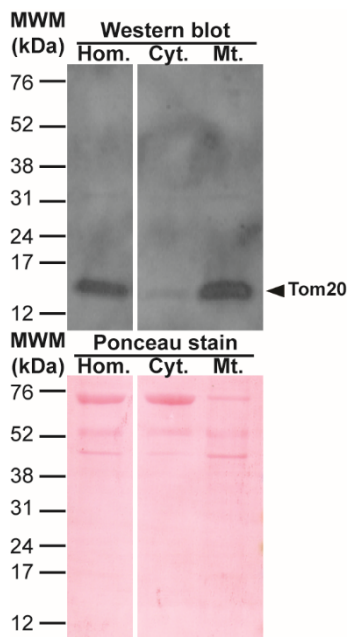

**Figure S2. Quality control of the mitochondrial fraction used for LC-MS/MS global lipidomics.** Upper panel, representative Western blotting of neuronal homogenates (Hom.), cytosolic (Cyt.) and mitochondrial (Mt) fractions immunoreacted with anti-Tom20 showing enrichment of mitochondria in Mt fraction used to assess lipidomics. Lower panel, protein content detected in each lane by Ponceau staining.

**Table S1**

**Detectable free fatty acids and relative quantification in primary neurons of WT and Tg rats**

|           | FFA (μM)    |          |       |         |
|-----------|-------------|----------|-------|---------|
|           | Palmitoleic | Palmitic | Oleic | Stearic |
| <b>WT</b> | 0.99        | 5.70     | 2.40  | 4.50    |
|           | 0.17        | 8.90     | 3.10  | 12.55   |
|           | 0.30        | 6.20     | 18.00 | 9.10    |
| <b>Tg</b> | 0.99        | 6.65     | 7.55  | 9.55    |
|           | 0.36        | 8.00     | 11.15 | 9.30    |
|           | 0.59        | 4.30     | 1.40  | 4.60    |
| <b>t</b>  | 0.50        | 0.42     | 0.19  | 0.31    |
| <b>α</b>  | 0.63        | 0.69     | 0.85  | 0.76    |

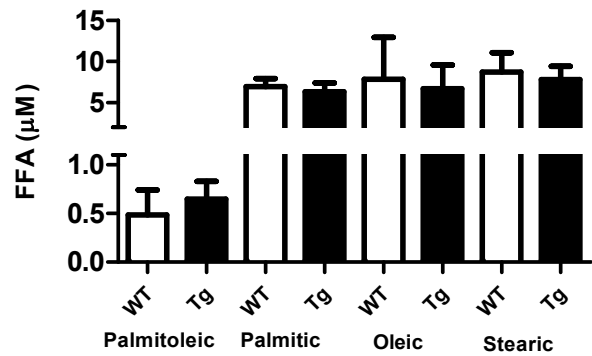

Three independent hippocampal primary neuronal cultures/genotype were performed using 10-12 embryos/culture. Free fatty acids (FFAs) row data from 3 biological samples (2 technical replicates) are provided in micromolar as extracted and do not represent the endogenous concentration. Inset, bars show mean ± SEM. A multiple t-test comparison was carried out in Prism between WT and Tg samples, but no significant ( $p < 0.05$ ) differences were observed for any of the detected FFAs.

**Table S2. Complete list of lipid names and relative quantification in mitochondrial extracts of WT and Tg neurons**

| Lipid short name | Retention time (min) | Nominal mass | WT Average | Tg Average | P value WT vs Tg |
|------------------|----------------------|--------------|------------|------------|------------------|
| plasmeyl-PE 36:4 | 13.7                 | 722          | 17272843   | 9522255    | 0.001            |
| CerP 42:4        | 13.7                 | 722          | 17272843   | 9522255    | 0.001            |
| PE 37:6          | 13.8                 | 748          | 20311364   | 8825412    | 0.002            |
| PC 20:0          | 15.5                 | 624          | 17433948   | 28166667   | 0.005            |

|                                      |      |     |           |          |       |
|--------------------------------------|------|-----|-----------|----------|-------|
| DGDG 15:0                            | 15.3 | 653 | 8904623   | 2098453  | 0.005 |
| PC 34:1                              | 13.9 | 818 | 49591234  | 30354157 | 0.007 |
| PC 33:2                              | 14.3 | 744 | 5410326   | 2372405  | 0.008 |
| DG 34:1                              | 15.3 | 612 | 12199583  | 3434804  | 0.009 |
| PC 27:1                              | 16   | 706 | 9165131   | 3124040  | 0.009 |
| PI 38:4                              | 8.3  | 885 | 11002317  | 2425867  | 0.010 |
| DG 40:6                              | 16   | 686 | 3415746   | 7078109  | 0.011 |
| DG 38:4                              | 15.3 | 662 | 8574788   | 3396817  | 0.012 |
| CL 76:11                             | 13.5 | 748 | 618420    | 249091   | 0.015 |
| PE 36:2                              | 14.2 | 744 | 16467800  | 5415078  | 0.015 |
| PE 38:5                              | 13.2 | 766 | 4311464   | 1382650  | 0.016 |
| N-(15Z-tetracosenoyl)-sphing-4-enine | 16   | 649 | 7726961   | 3056306  | 0.017 |
| SM 40:1                              | 15.3 | 788 | 3608982   | 856401   | 0.017 |
| PC 40:6                              | 13.7 | 834 | 6210569   | 2631169  | 0.020 |
| PC 38:3                              | 13.7 | 834 | 6210569   | 2631169  | 0.020 |
| plasmenyl-PE 38:5                    | 14.1 | 748 | 11115329  | 4972135  | 0.022 |
| plasmenyl-PE 38:4                    | 14.4 | 750 | 15223092  | 7415644  | 0.022 |
| PE 37:5                              | 14.4 | 750 | 15223092  | 7415644  | 0.022 |
| plasmenyl-PE 38:6                    | 13.4 | 746 | 8044789   | 2688952  | 0.023 |
| PC 35:1                              | 14.3 | 832 | 5422453   | 1324633  | 0.024 |
| PC 36:1                              | 14.7 | 846 | 15504496  | 7321780  | 0.027 |
| PC 31:1                              | 14.2 | 718 | 4301416   | 1764297  | 0.028 |
| SM 36:1                              | 13.8 | 732 | 13781411  | 7057502  | 0.028 |
| PC 24:5                              | 14   | 596 | 12313579  | 5660959  | 0.029 |
| SM 34:1                              | 11.5 | 704 | 9417851   | 2640561  | 0.032 |
| SM 42:2                              | 15.3 | 814 | 15735150  | 3656935  | 0.032 |
| DG 38:6                              | 15.5 | 658 | 3945400   | 6472196  | 0.033 |
| PC 36:4                              | 12.3 | 840 | 3581675   | 1699059  | 0.033 |
| PC 36:8                              | 14.3 | 774 | 15329783  | 3976324  | 0.034 |
| plasmenyl-PE 34:1                    | 14.5 | 700 | 21975474  | 8715185  | 0.036 |
| PE 34:1                              | 14.2 | 718 | 15109566  | 6876348  | 0.037 |
| PC 36:2                              | 14   | 844 | 15628949  | 6869951  | 0.041 |
| PE 39:8                              | 13.5 | 772 | 7644586   | 1865859  | 0.042 |
| CerP 45:0                            | 13.5 | 772 | 7644586   | 1865859  | 0.042 |
| PC 31:4                              | 13.9 | 734 | 102427232 | 56158573 | 0.043 |
| PC 33:0                              | 14.3 | 806 | 3811169   | 931700   | 0.043 |
| PC 38:5                              | 13.8 | 792 | 38201446  | 19646277 | 0.044 |
| PC 35:5                              | 14.7 | 788 | 39993681  | 19676793 | 0.046 |
| PC 32:5                              | 13.4 | 746 | 23122794  | 5452865  | 0.046 |
| PE 36:1                              | 14.9 | 746 | 16563712  | 7650983  | 0.047 |
| PC 35:6                              | 14   | 786 | 56923404  | 24813547 | 0.053 |
| SM 38:1                              | 14.7 | 760 | 3447997   | 1201630  | 0.053 |
| PC 33:1                              | 13.4 | 804 | 7430263   | 1546312  | 0.056 |
| PC 40:5                              | 14   | 836 | 6939986   | 3795618  | 0.056 |
| plasmenyl-PE 40:6                    | 14.3 | 774 | 9495351   | 3883077  | 0.057 |
| PE 39:7                              | 14.3 | 774 | 9495351   | 3883077  | 0.057 |
| PC 18:0                              | 14.8 | 538 | 13346498  | 21399766 | 0.058 |
| DG 33:3                              | 16   | 594 | 9798888   | 15814772 | 0.058 |
| PC 22:0                              | 16   | 594 | 9798888   | 15814772 | 0.058 |
| PC 35:2                              | 13.5 | 772 | 5933618   | 1048544  | 0.061 |

|                                 |      |     |           |           |       |
|---------------------------------|------|-----|-----------|-----------|-------|
| PC 33:5                         | 13.9 | 760 | 165858048 | 100220475 | 0.061 |
| NAE 20:0                        | 6.1  | 414 | 815115    | 2320952   | 0.072 |
| PC 31:0                         | 13.2 | 778 | 5486193   | 1041844   | 0.072 |
| PC 32:1                         | 12.1 | 790 | 9629590   | 3021733   | 0.072 |
| PE 35:3                         | 14.6 | 726 | 16335639  | 4985161   | 0.073 |
| MGDG 25:0                       | 4.7  | 655 | 15675998  | 30988373  | 0.074 |
| PC 40:7                         | 12.4 | 816 | 2816095   | 750348    | 0.076 |
| PC 38:2                         | 14.7 | 814 | 5370441   | 1620407   | 0.076 |
| MGDG 21:0                       | 3.6  | 599 | 4899817   | 14314581  | 0.077 |
| PC 32:4                         | 14.3 | 748 | 11762381  | 2936383   | 0.080 |
| MGDG 19:0                       | 15.5 | 566 | 19086022  | 25541805  | 0.086 |
| PI 38:3                         | 10   | 887 | 3156354   | 364885    | 0.087 |
| Sphingosine                     | 3.6  | 358 | 11783302  | 27976669  | 0.091 |
| plasmenyl-PE 40:4               | 14.9 | 778 | 8104350   | 3775774   | 0.092 |
| PE 39:6                         | 14.6 | 776 | 7012146   | 4054184   | 0.094 |
| N-(octadecanoyl)-sphing-4-enine | 14.8 | 567 | 12268813  | 5823270   | 0.097 |
| PC 38:6                         | 12.6 | 790 | 5781723   | 1866995   | 0.100 |
| PC 31:5                         | 12.6 | 732 | 18406535  | 6122249   | 0.102 |
| DG 38:3                         | 15.8 | 664 | 2880749   | 665473    | 0.104 |
| plasmenyl-PE 36:1               | 15.2 | 728 | 7831717   | 2207787   | 0.107 |
| TG 54:6                         | 18   | 896 | 1627518   | 3268849   | 0.107 |
| PC 36:0                         | 14.5 | 812 | 7444758   | 2275498   | 0.111 |
| PC 34:2                         | 12.9 | 816 | 3434267   | 873320    | 0.112 |
| N-(hexadecanoyl)-sphing-4-enine | 14   | 539 | 5692769   | 3126846   | 0.112 |
| CL 72:5                         | 14.4 | 726 | 4585510   | 1992032   | 0.114 |
| PC 30:0                         | 11.7 | 764 | 6180809   | 2020744   | 0.116 |
| PC 36:5                         | 11.7 | 764 | 6180809   | 2020744   | 0.116 |
| N,N-Dimethylsphingosine         | 4.7  | 386 | 46863544  | 88150719  | 0.122 |
| PE 40:5                         | 14.5 | 794 | 11809395  | 5359529   | 0.130 |
| PC 37:6                         | 14.8 | 776 | 8219032   | 4242501   | 0.139 |
| PC 32:2                         | 9.9  | 730 | 3491337   | 746643    | 0.144 |
| PE 40:3                         | 15.2 | 798 | 3856415   | 1040698   | 0.152 |
| plasmenyl-PE 36:3               | 14.4 | 724 | 7547618   | 2321413   | 0.164 |
| PC 36:3                         | 13.8 | 842 | 3407141   | 908160    | 0.170 |
| PE 40:4                         | 14.7 | 796 | 5169800   | 3171569   | 0.177 |
| PC 34:3                         | 11.4 | 756 | 2475957   | 374768    | 0.183 |
| CL 68:3                         | 14.3 | 700 | 114744    | 53518     | 0.186 |
| PC 21:0                         | 14.8 | 624 | 19935115  | 7711044   | 0.192 |
| plasmenyl-PE 38:3               | 14.9 | 752 | 5867230   | 1783285   | 0.193 |
| PE 37:4                         | 14.9 | 752 | 5867230   | 1783285   | 0.193 |
| PE 38:4                         | 14.2 | 768 | 31148033  | 19739020  | 0.211 |
| plasmenyl-PE 40:5               | 14.8 | 776 | 7605888   | 3685472   | 0.215 |
| PC 34:0                         | 14.6 | 820 | 10151492  | 5080510   | 0.220 |
| PE 40:6                         | 14   | 792 | 7653199   | 4558131   | 0.230 |
| PE 38:3                         | 14.7 | 770 | 10905128  | 2855981   | 0.235 |
| PC 32:0                         | 13.8 | 778 | 6274307   | 4434874   | 0.240 |
| PC 38:4                         | 14   | 868 | 3786977   | 2705120   | 0.268 |
| PI 6:0                          | 1.6  | 445 | 3811843   | 3237211   | 0.498 |
| MGDG 15:0                       | 14.1 | 515 | 2540384   | 1418963   | 0.505 |
| lysoPA 14:1                     | 1.5  | 381 | 1086724   | 2134695   | 0.591 |

|           |      |     |          |          |       |
|-----------|------|-----|----------|----------|-------|
| MG 22:6   | 1.5  | 409 | 11941124 | 11403416 | 0.619 |
| MGDG 28:1 | 14.9 | 671 | 5076155  | 5173572  | 0.903 |
| CL 74:3   | 14.2 | 742 | 35939    | ND       | NA    |

---

Three independent hippocampal primary neuronal cultures/genotype were performed using 10-12 embryos/culture and Mt isolated from each culture were processed independently. Unpaired two-tailed Student's t test was used for comparisons between genotypes.
